# Supplementary material for: C60-Fullerenes: detection of intracellular photoluminescence and lack of cytotoxic effects
Source: Springer Nature journal article supplement (doi:10.1186/1477-3155-4-14), 2006-12-01

**A**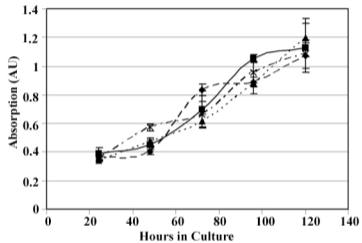**B**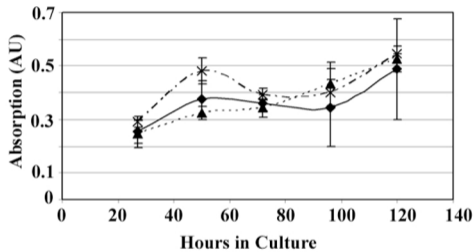

Supplement: Additional file 1 [file 1477-3155-4-14-s1.pdf]
